# Supplementary material for: Prediction of putative potential siRNAs for inhibiting SARS-CoV-2 strains, including variants of concern and interest
Source: Future Microbiol. 2022 Mar 14:10.2217/fmb-2021-0130. doi: 10.2217/fmb-2021-0130 (PMC8958991; doi:10.2217/fmb-2021-0130)
Supplement: Supplementary file 1 [file Supplementary_Files_revised_R2.xlsx]

## Sheet: Supplementary file 1
Supplementary File 1
Rules of Ui-Tei, Reynolds and Amarzguioui
Ui-Tei rules	Reynolds rules	Amarzguioui rules
i)Presence of 'A/U' at the 5′ end of the antisense strand	i)GC content is 30-52%	i) 3-nt duplex end'A/U' differential > 0 (Preferably +2 or +3)
ii) Presence of 'G/C' present at the 5′ terminus of the sense strand	ii)Presence of at least 3 'A/U' at positions 15-19 of sense strand	ii) Absence of U at position of 1 of sense strand of the duplex region
iii) Presence of at least five 'A/U' residues in the 5′ terminal one-third of the antisense strand	iii) Absence of internal repeats (Tm <20 ◦C)	iii)Absence of G at position 19 of sense strand of duplex region
iv)Absence of any GC stretch greater than 9 nt in length	iv)Presence of 'A' at position 19 of sense strand	iv)Presence of 'G/C' at position 1 of sense strand of duplex region
	v)Presence of 'U' at position 3 of sense strand	v)Presence of 'A' at position 6 of sense strand of duplex region
	vi)Presence of 'A' at position 10 of sense strand	vi)Presence of 'A/U' at position of sense strand of duplex region
	vii)Presence of other bases except 'G'or'C' at position 19 of sense strand
	viii)Absence of 'G' at postion 13 of sense strand

## Sheet: Supplementary File 2  Sheet 1
Supplementary File 2: Sheet 1
Sequences having accessions starting with “FR”, “HG”, “LC”, “LR”, “OA”, “OB”, “OC” and “OD”
FR989649
FR990847
FR993745
FR993747
FR993749
FR993750
FR993753
FR993754
FR993758
FR993759
FR993760
FR993762
FR993763
FR993764
FR993765
FR993766
FR993769
FR993771
FR993773
FR993774
FR993776
FR993778
FR993779
FR993781
FR993782
FR993784
FR993786
FR993787
HG996699
HG996707
HG996708
HG996709
HG996711
HG996712
HG996714
HG996715
HG996807
HG996808
HG996809
HG996810
HG996811
HG996812
HG996813
HG996814
HG996815
HG996816
HG996817
HG996818
HG996819
HG996820
HG996821
HG996822
HG996823
HG996824
HG996825
HG996826
HG996835
HG996842
HG996843
HG996845
HG996846
HG996847
HG996848
HG996849
HG996850
HG996851
HG996852
HG996853
HG996854
HG996855
HG996856
HG996857
HG996858
HG996859
HG996860
HG996861
HG996862
HG996863
HG996864
HG996865
HG996866
HG996869
HG996870
HG996871
HG996872
HG996873
HG996874
HG996875
HG996876
HG996877
HG996878
HG996879
HG996880
HG996881
HG996882
HG996883
HG996884
HG996885
HG996887
HG996888
HG996889
HG996890
HG996891
HG996892
HG996893
HG996894
HG996896
HG996897
HG996898
HG996899
HG996900
HG996901
HG996902
HG996903
HG996904
HG996906
HG996907
HG996908
HG996909
HG996910
HG996911
HG996912
HG996913
HG996914
HG996915
HG996916
HG996917
HG996919
HG996920
HG996921
HG996922
HG996923
HG996924
HG996925
HG996926
HG996927
HG996928
HG996929
HG996930
HG996931
HG996932
HG996933
HG996934
HG996935
HG996936
HG996937
HG996938
HG996939
HG996940
HG996941
HG996942
HG996943
HG996944
HG996945
HG996946
HG996947
HG996948
HG996949
HG996950
HG996951
HG996952
HG996953
HG996954
HG996955
HG996956
HG996957
HG996958
HG996959
HG996960
HG996961
HG996962
HG996963
HG996964
HG996965
HG996966
HG996967
HG996968
HG996969
HG996970
HG996971
HG996972
HG996973
HG996974
HG996975
HG996976
HG996977
HG996978
HG996979
HG996980
HG996981
HG996982
HG996983
HG996984
HG996985
HG996986
HG996987
HG996988
HG996989
HG996990
HG996991
HG996992
HG996993
HG996994
HG996995
HG996996
HG996997
HG996998
HG996999
HG997000
HG997001
HG997002
HG997003
HG997004
HG997005
HG997006
HG997007
HG997008
HG997009
HG997010
HG997011
HG997012
HG997013
HG997014
HG997015
HG997016
HG997017
HG997018
HG997019
HG997020
HG997021
HG997022
HG997023
HG997024
HG997025
HG997026
HG997027
HG997028
HG997029
HG997030
HG997031
HG997032
HG997033
HG997034
HG997035
HG997036
HG997037
HG997038
HG997039
HG997040
HG997041
HG997042
HG997043
HG997044
HG997045
HG997046
HG997047
HG997048
HG997049
HG997050
HG997051
HG997052
HG997053
HG997054
HG997055
HG997056
HG997057
HG997058
HG997059
HG997060
HG997061
HG997062
HG997063
HG997064
HG997065
HG997066
HG997067
HG997068
HG997069
HG997070
HG997071
HG997072
HG997073
HG997074
HG997075
HG997076
HG997077
HG997078
HG997079
HG997080
HG997081
HG997082
HG997083
HG997084
HG997085
HG997086
HG997087
HG997088
HG997089
HG997090
HG997091
HG997092
HG997093
HG997094
HG997095
HG997096
HG997097
HG997098
HG997099
HG997100
HG997101
HG997102
HG997103
HG997104
HG997105
HG997106
HG997107
HG997108
HG997109
HG997110
HG997111
HG997112
HG997113
HG997114
HG997115
HG997116
HG997117
HG997118
HG997119
HG997120
HG997121
HG997122
HG997123
HG997124
HG997125
HG997126
HG997127
HG997128
HG997129
HG997130
HG997131
HG997132
HG997133
HG997134
HG997135
HG997136
HG997137
HG997138
HG997139
HG997140
HG997141
HG997142
HG997143
HG997144
HG997145
HG997146
HG997147
HG997148
HG997149
HG997150
HG997151
HG997152
HG997153
HG997154
HG997155
HG997156
HG997157
HG997158
HG997159
HG997160
HG997161
HG997162
HG997163
HG997164
HG997165
HG997166
HG997167
HG997168
HG997169
HG997170
HG997171
HG997172
HG997173
HG997174
HG997175
HG997176
HG997177
HG997178
HG997179
HG997180
HG997181
HG997182
HG997183
HG997184
HG997185
HG997186
HG997187
HG997188
HG997189
HG997190
HG997191
HG997192
HG997193
HG997194
HG997195
HG997196
HG997197
HG997198
HG997199
HG997200
HG997201
HG997202
HG997203
HG997204
HG997205
HG997206
HG997207
HG997208
HG997209
HG997210
HG997211
HG997212
HG997213
HG997214
HG997215
HG997216
HG997217
HG997218
HG997219
HG997220
HG997221
HG997222
HG997223
HG997224
HG997225
HG997226
HG997227
HG997228
HG997229
HG997230
HG997231
HG997232
HG997233
HG997234
HG997235
HG997236
HG997237
HG997238
HG997243
HG997244
HG997245
HG997246
HG997819
HG997820
HG997821
HG997822
HG997823
HG997824
HG997825
HG997826
HG997827
HG997828
HG998388
HG998389
HG998390
HG998391
HG998392
HG998393
HG998394
HG998395
HG998396
HG998397
HG998398
HG998399
HG998400
HG998401
HG998402
HG998403
HG998404
HG998405
HG998406
HG998407
HG998408
HG998409
HG998410
HG998411
HG998412
HG998413
HG998414
HG998415
HG998416
HG998417
HG998418
HG998419
HG998420
HG998421
HG998422
HG998423
HG998424
HG998425
HG998426
HG998427
HG998428
HG998429
HG998430
HG998431
HG998432
HG998433
HG998434
HG998435
HG998436
HG998437
HG998438
HG998439
HG998440
HG998441
HG998442
HG998443
HG998444
HG998445
HG998446
HG998450
HG998454
HG998460
HG998461
HG998574
HG998575
HG998576
HG998577
HG998578
HG998579
HG998580
HG998581
HG998582
HG998583
HG998584
HG998585
HG998586
HG998587
HG998588
HG998589
HG998590
HG998591
HG998592
HG998593
HG998594
HG998595
HG998596
HG998597
HG998598
HG998599
HG998600
HG998601
HG998602
HG998603
HG998604
HG998605
HG998606
HG998607
HG998608
HG998609
HG998610
HG998611
HG998612
HG998613
HG998614
HG998615
HG998616
HG998617
HG998618
HG998619
HG998620
HG998621
HG998622
HG998623
HG998624
HG998625
HG998626
HG998627
HG998628
HG998629
HG998630
HG998631
HG998632
HG998633
HG998634
HG998635
HG998636
HG998637
HG998638
HG998639
HG998640
HG998641
HG998642
HG998643
HG998644
HG998645
HG998646
HG998647
HG998648
HG998649
HG998650
HG998651
HG998652
HG998653
HG998654
HG998655
HG998656
HG998657
HG998658
HG998659
HG998660
HG998661
HG998662
HG998663
HG998664
HG998665
HG998666
HG998667
HG998668
HG998669
HG998670
HG998671
HG998672
HG998673
HG998674
HG998675
HG998676
HG998677
HG998678
HG998679
HG998680
HG998681
HG998682
HG998683
HG998684
HG998685
HG998686
HG998687
HG998688
HG998689
HG998690
HG998691
HG998692
HG998693
HG998694
HG998695
HG998696
HG998697
HG998698
HG998699
HG998700
HG998701
HG998702
HG998703
HG998704
HG998705
HG998706
HG998707
HG998708
HG998709
HG998710
HG998711
HG998712
HG998713
HG998714
HG998715
HG998716
HG998717
HG998718
HG998719
HG998720
HG998721
HG998722
HG998723
HG998724
HG998725
HG998726
HG998727
HG998728
HG998729
HG998730
HG998731
HG998732
HG998733
HG998734
HG998735
HG998736
HG998737
HG998738
HG998739
HG998740
HG998741
HG998742
HG998743
HG998744
HG998745
HG998746
HG998747
HG998748
HG998749
HG998750
HG998751
HG998752
HG998753
HG998754
HG998755
HG998756
HG998757
HG998758
HG998759
HG998760
HG998761
HG998762
HG998763
HG998764
HG998765
HG998766
HG998767
HG998768
HG998769
HG998770
HG998771
HG998772
HG998773
HG998774
HG998775
HG998776
HG998777
HG998778
HG998779
HG998780
HG998781
HG998782
HG998783
HG998784
HG998785
HG998786
HG998787
HG998788
HG998789
HG998790
HG998791
HG998792
HG998793
HG998794
HG998795
HG998796
HG998797
HG998798
HG998799
HG998800
HG998801
HG998802
HG998803
HG998804
HG998805
HG998806
HG998807
HG998808
HG998809
HG998810
HG998811
HG998812
HG998813
HG998814
HG998815
HG998816
HG998817
HG998818
HG998819
HG998820
HG998821
HG998822
HG998823
HG998824
HG998825
HG998826
HG998827
HG998828
HG998829
HG998830
HG998831
HG998832
HG998833
HG998834
HG998835
HG998836
HG998837
HG998838
HG998839
HG998840
HG998841
HG998842
HG998843
HG998844
HG998845
HG998846
HG998847
HG998848
HG998849
HG998850
HG998851
HG998852
HG998853
HG998854
HG998855
HG998856
HG998857
HG998858
HG998859
HG998860
HG998861
HG998862
HG998863
HG998864
HG998865
HG998866
HG998867
HG998868
HG998869
HG998870
HG998871
HG998872
HG998873
HG998874
HG998875
HG998876
HG998877
HG998878
HG998879
HG998880
HG998881
HG998882
HG998883
HG998884
HG998885
HG998886
HG998887
HG998888
HG998889
HG998890
HG998891
HG998892
HG998893
HG998894
HG998895
HG998896
HG998897
HG998898
HG998899
HG998900
HG998901
HG998902
HG998903
HG998904
HG998905
HG998906
HG998907
HG998908
HG998909
HG998910
HG998911
HG998912
HG998913
HG998914
HG998915
HG998916
HG998917
HG998918
HG998919
HG998920
HG998921
HG998922
HG998923
HG998924
HG998925
HG998926
HG998927
HG998928
HG998929
HG998930
HG998931
HG998932
HG998933
HG998934
HG998935
HG998936
HG998937
HG998938
HG998939
HG998940
HG998941
HG998942
HG998943
HG998944
HG998945
HG998946
HG998947
HG998948
HG998949
HG998950
HG998951
HG998952
HG998953
HG998954
HG998955
HG998956
HG998957
HG998958
HG998959
HG998960
HG998961
HG998962
HG998963
HG998964
HG998965
HG998966
HG998967
HG998968
HG998969
HG998970
HG998971
HG998972
HG998973
HG998974
HG998975
HG998976
HG998977
HG998978
HG998979
HG998980
HG998981
HG998982
HG998983
HG998984
HG998985
HG998986
HG998987
HG998988
HG998989
HG998990
HG998991
HG998992
HG998993
HG998994
HG998995
HG998996
HG998997
HG998998
HG998999
HG999000
HG999001
HG999002
HG999003
HG999004
HG999005
HG999006
HG999007
HG999008
HG999009
HG999010
HG999011
HG999012
HG999013
HG999014
HG999015
HG999016
HG999017
HG999018
HG999019
HG999020
HG999021
HG999022
HG999023
HG999024
HG999025
HG999026
HG999027
HG999028
HG999029
HG999030
HG999031
HG999032
HG999033
HG999034
HG999035
HG999036
HG999037
HG999038
HG999039
HG999040
HG999041
HG999042
HG999043
HG999044
HG999045
HG999046
HG999047
HG999048
HG999049
HG999050
HG999051
HG999052
HG999053
HG999054
HG999055
HG999056
HG999057
HG999058
HG999059
HG999060
HG999061
HG999062
HG999063
HG999064
HG999065
HG999066
HG999067
HG999068
HG999069
HG999070
HG999071
HG999072
HG999073
HG999074
HG999075
HG999076
HG999077
HG999078
HG999079
HG999080
HG999081
HG999082
HG999083
HG999084
HG999085
HG999086
HG999087
HG999088
HG999089
HG999090
HG999091
HG999092
HG999093
HG999094
HG999095
HG999096
HG999097
HG999098
HG999099
HG999100
HG999101
HG999102
HG999103
HG999104
HG999105
HG999106
HG999107
HG999108
HG999109
HG999110
HG999111
HG999112
HG999113
HG999114
HG999115
HG999116
HG999117
HG999118
HG999119
HG999120
HG999121
HG999122
HG999123
HG999124
HG999125
HG999126
HG999127
HG999128
HG999129
HG999130
HG999131
HG999132
HG999133
HG999134
HG999135
HG999136
HG999137
HG999138
HG999139
HG999140
HG999141
HG999142
HG999143
HG999144
HG999145
HG999146
HG999147
HG999148
HG999149
HG999150
HG999151
HG999152
HG999153
HG999154
HG999155
HG999156
HG999157
HG999158
HG999159
HG999160
HG999161
HG999162
HG999163
HG999164
HG999165
HG999166
HG999167
HG999168
HG999169
HG999170
HG999171
HG999172
HG999173
HG999174
HG999175
HG999176
HG999177
HG999178
HG999179
HG999180
HG999181
HG999182
HG999183
HG999184
HG999185
HG999186
HG999187
HG999188
HG999189
HG999190
HG999191
HG999192
HG999193
HG999194
HG999195
HG999196
HG999197
HG999198
HG999199
HG999200
HG999201
HG999202
HG999203
HG999204
HG999205
HG999206
HG999207
HG999208
HG999209
HG999210
HG999211
HG999212
HG999213
HG999214
HG999215
HG999216
HG999217
HG999218
HG999219
HG999220
HG999221
HG999222
HG999223
HG999224
HG999225
HG999226
HG999227
HG999228
HG999229
HG999230
HG999231
HG999232
HG999233
HG999234
HG999235
HG999236
HG999237
HG999238
HG999239
HG999240
HG999241
HG999242
HG999243
HG999244
HG999245
HG999246
HG999247
HG999248
HG999249
HG999250
HG999251
HG999252
HG999253
HG999254
HG999255
HG999256
HG999257
HG999258
HG999259
HG999260
HG999261
HG999262
HG999263
HG999264
HG999265
HG999266
HG999267
HG999268
HG999269
HG999270
HG999271
HG999272
HG999273
HG999274
HG999275
HG999276
HG999277
HG999278
HG999279
HG999280
HG999281
HG999282
HG999283
HG999284
HG999285
HG999286
HG999287
HG999288
HG999289
HG999290
HG999291
HG999292
HG999293
HG999294
HG999295
HG999296
HG999297
HG999298
HG999299
HG999300
HG999301
HG999302
HG999303
HG999304
HG999305
HG999306
HG999307
HG999308
HG999309
HG999310
HG999311
HG999312
HG999313
HG999314
HG999315
HG999316
HG999317
HG999318
HG999319
HG999320
HG999321
HG999322
HG999323
HG999324
HG999325
HG999326
HG999327
HG999328
HG999329
HG999330
HG999331
HG999332
HG999333
HG999334
HG999335
HG999336
HG999337
HG999338
HG999339
HG999340
HG999341
HG999342
HG999343
HG999344
HG999345
HG999346
HG999347
HG999348
HG999349
HG999350
HG999351
HG999352
HG999353
HG999354
HG999355
HG999356
HG999357
LC606018
LC606019
LC606020
LC606021
LC606022
LC623934
LC623935
LC623936
LC623937
LC623938
LC623939
LC623940
LC623941
LC623942
LC623943
LC623944
LC623945
LC623946
LC623947
LC623948
LC623949
LC623950
LR991698
LR991699
OA971982
OA971984
OA971985
OA971986
OA971987
OA971988
OA971989
OA971990
OA971991
OA971992
OA971993
OA971994
OA971995
OA971996
OA971997
OA971998
OA971999
OA972000
OA972001
OA972002
OA972003
OA972004
OA972005
OA972006
OA972007
OA972008
OA972009
OA972010
OA972011
OA972012
OA972013
OA972014
OA972015
OA972016
OA972017
OA972018
OA972019
OA972020
OA972021
OA972022
OA972023
OA972024
OA972025
OA972026
OA972027
OA972028
OA972029
OA972030
OA972031
OA972032
OA972033
OA972034
OA972035
OA972036
OA972037
OA972038
OA972039
OA972040
OA972041
OA972042
OA972043
OA972044
OA972045
OA972046
OA972047
OA972048
OA972049
OA972050
OA972051
OA972052
OA972053
OA972054
OA972055
OA972056
OA972057
OA972058
OA972059
OA972060
OA972061
OA972062
OA972063
OA972064
OA972065
OA972066
OA972067
OA972068
OA972069
OA972070
OA972071
OA972072
OA972073
OA972074
OA972075
OA972076
OA972077
OA972078
OA972079
OA972080
OA972081
OA972082
OA972083
OA972084
OA972085
OA972086
OA972087
OA972088
OA972089
OA972090
OA972091
OA972092
OA972093
OA972094
OA972095
OA972096
OA972097
OA972098
OA972099
OA972100
OA972101
OA972102
OA972103
OA972104
OA972105
OA972106
OA972107
OA972108
OA972109
OA972110
OA972111
OA972112
OA972113
OA972114
OA972115
OA972116
OA972117
OA972118
OA972119
OA972120
OA972121
OA972122
OA972123
OA972124
OA972125
OA972126
OA972127
OA972128
OA972129
OA972130
OA972131
OA972132
OA972133
OA972134
OA972135
OA972136
OA972137
OA972138
OA972139
OA972140
OA972141
OA972142
OA972143
OA972144
OA972145
OA972146
OA972147
OA972148
OA972149
OA972150
OA972151
OA972152
OA972153
OA972154
OA972155
OA972156
OA972157
OA972158
OA972159
OA972160
OA972161
OA972162
OA972163
OA972164
OA972165
OA972166
OA972167
OA972168
OA972169
OA972170
OA972171
OA972172
OA972173
OA972174
OA972175
OA972176
OA972177
OA972178
OA972179
OA972180
OA972181
OA972182
OA972183
OA972184
OA972185
OA972186
OA972187
OA972188
OA972189
OA972190
OA972191
OA972192
OA972193
OA972194
OA972195
OA972196
OA972197
OA972198
OA972199
OA972200
OA972201
OA972202
OA972203
OA972204
OA972205
OA972206
OA972207
OA972208
OA972209
OA972210
OA972211
OA972212
OA972213
OA972348
OA972350
OA972352
OA972353
OA972354
OA972355
OA972356
OA972357
OA972358
OA972359
OA972360
OA972361
OA972362
OA972363
OA972364
OA972365
OA972366
OA972367
OA972368
OA972369
OA972370
OA972371
OA972372
OA972373
OA972374
OA972375
OA972376
OA972377
OA972378
OA972379
OA972380
OA972381
OA972382
OA972383
OA972384
OA972385
OA972386
OA972387
OA972388
OA972389
OA972390
OA972391
OA972393
OA972394
OA972395
OA972396
OA972398
OA972399
OA972400
OA972401
OA972402
OA972403
OA972404
OA972405
OA972406
OA972408
OA972409
OA972410
OA972411
OA972412
OA972413
OA972414
OA972415
OA972416
OA972417
OA972418
OA972419
OA972420
OA972421
OA972422
OA972423
OA972424
OA972425
OA972426
OA972427
OA972428
OA972429
OA972430
OA972431
OA972432
OA972433
OA972434
OA972435
OA972436
OA972437
OA972438
OA972439
OA972440
OA972441
OA972442
OA972443
OA972444
OA972445
OA972446
OA972447
OA972448
OA972449
OA972450
OA972451
OA972452
OA972453
OA972454
OA972455
OA972456
OA972457
OA972458
OA972459
OA972460
OA972461
OA972462
OA972463
OA972464
OA972465
OA972466
OA972467
OA972468
OA972470
OA972505
OA972506
OA972510
OA972513
OA972514
OA972515
OA972516
OA972517
OA972518
OA972519
OA972520
OA972521
OA972522
OA972523
OA972524
OA972525
OA972526
OA972527
OA972528
OA972529
OA972530
OA972531
OA972532
OA972533
OA972534
OA972535
OA972536
OA972537
OA972538
OA972539
OA972540
OA972541
OA972542
OA972543
OA972544
OA972545
OA972546
OA972547
OA972548
OA972549
OA972550
OA972551
OA972552
OA972553
OA972554
OA972555
OA972556
OA972557
OA972558
OA972559
OA972560
OA972561
OA972562
OA972563
OA972564
OA972565
OA972566
OA972567
OA972568
OA972569
OA972570
OA972571
OA972572
OA972573
OA972574
OA972575
OA972576
OA972577
OA972585
OA972586
OA972589
OA972590
OA972591
OA972592
OA972593
OA972594
OA972595
OA972596
OA972597
OA972598
OA972599
OA972600
OA972601
OA972602
OA972603
OA972604
OA972605
OA972606
OA972607
OA972608
OA972609
OA972610
OA972611
OA972612
OA972613
OA972614
OA972615
OA972616
OA972617
OA972618
OA972619
OA972620
OA972621
OA972622
OA972623
OA972624
OA972625
OA972626
OA972627
OA972628
OA972629
OA972630
OA972631
OA972632
OA972633
OA972634
OA972635
OA972636
OA972637
OA972638
OA972639
OA972640
OA972642
OA972643
OA972644
OA972646
OA972647
OA972650
OA972651
OA972652
OA972653
OA972655
OA972656
OA972657
OA972658
OA972661
OA972663
OA972664
OA972665
OA972666
OA972667
OA972668
OA972669
OA972670
OA972671
OA972672
OA972673
OA972674
OA972675
OA972676
OA972677
OA972678
OA972679
OA972680
OA972681
OA972682
OA972683
OA972684
OA972685
OA972686
OA972687
OA972688
OA972689
OA972690
OA972691
OA972692
OA972696
OA972698
OA972700
OA972702
OA972704
OA972706
OA972707
OA972709
OA972710
OA972711
OA972712
OA972713
OA972715
OA972716
OA972717
OA972718
OA972719
OA972720
OA972721
OA972722
OA972723
OA972727
OA972731
OA973214
OA973215
OA973216
OA973218
OA973220
OA973221
OA973222
OA973223
OA973224
OA973234
OA973236
OA973237
OA973238
OA973239
OA973240
OA973241
OA973242
OA973243
OA973244
OA973249
OA973251
OA973253
OA973254
OA973255
OA973256
OA973257
OA973259
OA973260
OA973261
OA973262
OA973263
OA973264
OA973266
OA973267
OA973269
OA973271
OA973272
OA973274
OA973275
OA973276
OA973284
OA973285
OA973288
OA973289
OA973290
OA973291
OA973292
OA973293
OA973294
OA973295
OA973298
OA973299
OA973300
OA973301
OA973302
OA973303
OA973305
OA973308
OA973309
OA973311
OA973314
OA973316
OA973317
OA973318
OA973319
OA973320
OA973321
OA973322
OA973323
OA973324
OA973325
OA973326
OA973327
OA973328
OA973329
OA973330
OA973331
OA973332
OA973333
OA973334
OA973335
OA973336
OA973337
OA973338
OA973339
OA973340
OA973341
OA973342
OA973343
OA973344
OA973345
OA973346
OA973347
OA973348
OA973349
OA973350
OA973351
OA973352
OA973353
OA973354
OA973355
OA973356
OA973357
OA973358
OA973359
OA973360
OA973361
OA973362
OA973363
OA973364
OA973365
OA973366
OA973367
OA973368
OA973375
OA973421
OA973422
OA973426
OA973427
OA973432
OA973434
OA973435
OA973437
OA973439
OA973440
OA973441
OA973442
OA973443
OA973444
[truncated: 114,773 more rows]

## Sheet: Supplementary File 2 Sheet 2
Supplementary File 2: Sheet 2
Number of sequences taken from each month
Month	Year	No of sequences
September	2020	22
October	2020	19
November	2020	37
December	2020	58
January	2021	107
February	2021	166
March	2021	324
April	2021	241
May	2021 (Until 06/05/21)	18
Total		992

## Sheet: Supplementary File 2 Sheet 3
Supplementary File 2: Sheet 3
Sequences which do not have Orf 8 protein
MW626467
MW571168
MW769722
MW769718
MW735548
MW841932
MW725822
MW840417
MW664379
MW808077
MW773590
MW963645
MW841916
MW808059
MW842291
MW842330
MW963496
MW773144
MW720630
MW892481
MW713660
MW725607
MW849853
MW720616
MW773702
MW863667
MW773480
MW720641
MW773561
MW773550
MW752496
MW807858
MW840386
MW914185
MZ006293
MW799795
MW966192
MW968380
MZ022642
MW905147
MW938552
MW908232
MW969171
MW931020
MZ013609
MW966105
MW932405
MZ023117
MW979400
MW908703
MW990760
MW966868
MZ011204
MW796976
MW864723
MW831035
MW931103
MW907903
MZ023515
MZ004783
MW914636
MZ002793
MW991334
MW864619
MZ024419
MW905014
MW905057
MW908992
MW987979
MW907150
MW932098
MW905689
MZ006867
MW931475
MW930070
MW865276
MZ022922
MW968871
MW865703
MW912209
MZ024497
MW968251
MZ012346
MZ024767
MZ002998
MW991169
MZ037647
MW968144
MW966767
MW829572
MZ002031
MW931422
MW809049
MZ001342
MW913516
MW869036
MW874935
MZ004737
MZ008836
MW881997
MZ011914
MW869448
MW877273
MW969195
MZ013658
MW967895
MW907127
MW904947
MW990944
MW987997
MZ013179
MW865226
MW908287
MW905107
MW991317
MW907642
MW904544
MZ012470
MW935488
MZ000851
MW968939
MW994015
MW908326
MW994607
MW967021
MW904079
MZ023039
MW831048
MW868960
MW930703
MW788921
MZ007078
MZ005993
MW991126
MW914201
MW915266
MW864906
MZ012399
MW877138
MW842174
MW935798
MW968119
MW967127
MW931141
MW912195
MW969434
MW844959
MW894283
MZ001561
MW990737
MW729268
MZ022255
MW840982
MW990848
MW864645
MW931442
MW909417
MW972041
MW892173
MW864768
MW967329
MW841823
MW931443
MW912014
MW842171
MZ054405
MW929943
MW963398
MZ000189
MZ056052
MZ022791
MW840914
MZ002715
MW841942
MZ012968
MZ009634
MW930087
MZ037629
MZ000365
MZ023136
MW967787
MW912062
MW963813
MW932064
MW905465
MW966342
MW869270
MZ069223
MW979417
MW989205
MZ058850
MW990548
MW990589
MZ061481
MZ021867
MW989170
MZ030162
MZ009776
MZ060986
MZ035006
MZ070154
MZ058761
MZ058789
MZ061530
MZ060465
MZ035706
MZ059279
MZ032399
MZ032651
MZ064998
MZ071433
MZ062174
MZ035701
MW990625
MZ035005
MW965117
MZ009721
MZ044536
MZ006631
MW959402
MZ068900
MZ034492
MZ061116
MZ018854
MZ062195
MZ022641
MZ035827
MZ053636
MZ058279
MZ029974
MZ034810
MZ035486
MZ009123
MZ058705
MZ025780
MZ056116
MZ061185
MZ058820
MZ009021
MZ060751
MZ058385
MW972295
MZ029980
MZ061231
MZ046462
MZ007040
MZ056442
MW965045
MZ009789
MZ039723
MZ034395
MZ073516
MW988498
MZ049953
MZ030348
MZ073594
MZ035376
MZ034245
MZ009175
MW988127
MZ015045
MZ045338
MW965088
MZ025355
MZ044632
MZ015478
MZ053874
MZ025530
MZ048527
MZ013323
MZ056226
MZ023907
MZ062142
MZ025340
MZ006140
MZ046744
MZ013382
MZ045278
MW965042
MZ023913
MZ015042
MZ046493
MZ045070
MZ072657
MZ025120
MZ013249
MZ013459
MZ025373
MZ073399
MZ006021
MZ009843
MZ046503
MZ034916
MW965066
MZ023894
MZ064851
MZ002856
MZ100224
MZ075410
MZ084852
MZ075487
MZ082547
MZ085684
MZ073816
MZ082825
MZ074806
MZ101197
MZ083891
MZ101299
MZ074046
MZ074715
MZ101200
MZ085776
MZ086576
MZ100773
MZ085816
MZ074389
MZ074574
MZ074443
MZ082323
MZ086588
MZ084713
MZ100619
MZ083551
MZ084637
MZ083670
MZ086530
MZ074383
MZ084066
MZ075284
MZ100990
MZ085710
MZ084466
MZ100394
MZ090385
MZ090151
MZ075267
MZ084744
MZ086491
MZ076068
MZ075956
MZ086280
MZ088010
MZ100704
MZ100575
MZ083706
MZ083457
MZ088007
MZ074074
MZ085957
MZ101004
MZ100911
MZ100657
MZ085286
MZ082722
MZ100912
MZ075597
MZ101027
MZ085248

## Sheet: Supplementary File 2  Sheet 4
Supplementary File 2: Sheet 4
Number of protein sequences retrieved for each protein
Protein	No of sequences
Orf 10	1016
Orf 1ab polyprotein	1016
Orf 6	1016
Orf 7a	1015
Orf 7b	1016
Orf 3a	1015
Orf 8	858
Surface glycoprotein	1016
Membrane glycoprotein	1016
Nucleocapsid phosphoprotein	1016
Envelope protein	1016

## Sheet: Supplementary file 2  Sheet 5
Supplementary file 2: Sheet 5
Pango lineage distribution of 992 sequences
Accession numbers	Pango lineage
MW667352	A.23.1
MW849965	A.23.1
MW922995	B.1
MW562055	B.1
MW564890	B.1
MW562760	B.1
MW521581	B.1
MW708603	B.1
MW495100	B.1
MW674675	B.1
MW750173	B.1
MZ024354	B.1
MW864473	B.1
MZ002435	B.1
MW993127	B.1
MW974584	B.1.1.135
MW974423	B.1.1.139
MW276227	B.1.1.174
MW565813	B.1.1.205
MW653573	B.1.1.205
MW157237	B.1.1.207
MW406504	B.1.1.207
MW696216	B.1.1.207
MW703437	B.1.1.207
MW738058	B.1.1.222
MW738069	B.1.1.222
MW969264	B.1.1.222
MW820239	B.1.1.222
MW995113	B.1.1.222
MW493926	B.1.1.265
MW242999	B.1.1.306
MW687394	B.1.1.316
MW930940	B.1.1.316
MW870907	B.1.1.322
MW668842	B.1.1.345
MW778909	B.1.1.348
MW777594	B.1.1.348
MW967114	B.1.1.348
MW741618	B.1.1.362
MW693070	B.1.1.362
MZ028774	B.1.1.416
MW778603	B.1.1.432
MW640229	B.1.1.434
MW731436	B.1.1.434
MW720288	B.1.1.434
MW750058	B.1.1.434
MW752050	B.1.1.434
MW891755	B.1.1.434
MW519635	B.1.1.519
MW666910	B.1.1.519
MW669152	B.1.1.519
MW699204	B.1.1.519
MW772186	B.1.1.519
MW731068	B.1.1.519
MZ013816	B.1.1.519
MW773425	B.1.1.519
MZ046637	B.1.1.519
MW966625	B.1.1.519
MW848019	B.1.1.519
MW897483	B.1.1.519
MW904428	B.1.1.519
MW994779	B.1.1.519
MZ003838	B.1.1.519
MW891149	B.1.1.519
MZ003164	B.1.1.519
MZ000181	B.1.1.519
MW993509	B.1.1.519
MW808786	B.1.1.519
MW891375	B.1.1.519
MW945232	B.1.1.519
MW825715	B.1.1.519
MW966966	B.1.1.519
MW964532	B.1.1.519
MW930761	B.1.1.519
MW626467	B.1.1.7
MW571168	B.1.1.7
MW769722	B.1.1.7
MW769718	B.1.1.7
MW735548	B.1.1.7
MW841932	B.1.1.7
MW725822	B.1.1.7
MW840417	B.1.1.7
MW664379	B.1.1.7
MW808077	B.1.1.7
MW773590	B.1.1.7
MW963645	B.1.1.7
MW841916	B.1.1.7
MW808059	B.1.1.7
MW842291	B.1.1.7
MW842330	B.1.1.7
MW963496	B.1.1.7
MW773144	B.1.1.7
MW720630	B.1.1.7
MW892481	B.1.1.7
MW713660	B.1.1.7
MW725607	B.1.1.7
MW849853	B.1.1.7
MW720616	B.1.1.7
MW773702	B.1.1.7
MW863667	B.1.1.7
MW773480	B.1.1.7
MW720641	B.1.1.7
MW773561	B.1.1.7
MW773550	B.1.1.7
MW752496	B.1.1.7
MW807858	B.1.1.7
MW840386	B.1.1.7
MW914185	B.1.1.7
MZ006293	B.1.1.7
MW799795	B.1.1.7
MW966192	B.1.1.7
MW968380	B.1.1.7
MZ022642	B.1.1.7
MW905147	B.1.1.7
MW938552	B.1.1.7
MW908232	B.1.1.7
MW969171	B.1.1.7
MW931020	B.1.1.7
MZ013609	B.1.1.7
MW966105	B.1.1.7
MW932405	B.1.1.7
MZ023117	B.1.1.7
MW979400	B.1.1.7
MW908703	B.1.1.7
MW990760	B.1.1.7
MW966868	B.1.1.7
MZ011204	B.1.1.7
MW796976	B.1.1.7
MW864723	B.1.1.7
MW831035	B.1.1.7
MW931103	B.1.1.7
MW907903	B.1.1.7
MZ023515	B.1.1.7
MZ004783	B.1.1.7
MW914636	B.1.1.7
MZ002793	B.1.1.7
MW991334	B.1.1.7
MW864619	B.1.1.7
MZ024419	B.1.1.7
MW905014	B.1.1.7
MW905057	B.1.1.7
MW908992	B.1.1.7
MW987979	B.1.1.7
MW907150	B.1.1.7
MW932098	B.1.1.7
MW905689	B.1.1.7
MZ006867	B.1.1.7
MW931475	B.1.1.7
MW930070	B.1.1.7
MW865276	B.1.1.7
MZ022922	B.1.1.7
MW968871	B.1.1.7
MW865703	B.1.1.7
MW912209	B.1.1.7
MZ024497	B.1.1.7
MW968251	B.1.1.7
MZ012346	B.1.1.7
MZ024767	B.1.1.7
MZ002998	B.1.1.7
MW991169	B.1.1.7
MZ037647	B.1.1.7
MW968144	B.1.1.7
MW966767	B.1.1.7
MW829572	B.1.1.7
MZ002031	B.1.1.7
MW931422	B.1.1.7
MW809049	B.1.1.7
MZ001342	B.1.1.7
MW913516	B.1.1.7
MW869036	B.1.1.7
MW874935	B.1.1.7
MZ004737	B.1.1.7
MZ008836	B.1.1.7
MW881997	B.1.1.7
MZ011914	B.1.1.7
MW869448	B.1.1.7
MW877273	B.1.1.7
MW969195	B.1.1.7
MZ013658	B.1.1.7
MW967895	B.1.1.7
MW907127	B.1.1.7
MW904947	B.1.1.7
MW990944	B.1.1.7
MW987997	B.1.1.7
MZ013179	B.1.1.7
MW865226	B.1.1.7
MW908287	B.1.1.7
MW905107	B.1.1.7
MW991317	B.1.1.7
MW907642	B.1.1.7
MW904544	B.1.1.7
MZ012470	B.1.1.7
MW935488	B.1.1.7
MZ000851	B.1.1.7
MW968939	B.1.1.7
MW994015	B.1.1.7
MW908326	B.1.1.7
MW994607	B.1.1.7
MW967021	B.1.1.7
MW904079	B.1.1.7
MZ023039	B.1.1.7
MW831048	B.1.1.7
MW868960	B.1.1.7
MW930703	B.1.1.7
MW788921	B.1.1.7
MZ007078	B.1.1.7
MZ005993	B.1.1.7
MW991126	B.1.1.7
MW914201	B.1.1.7
MW915266	B.1.1.7
MW864906	B.1.1.7
MZ012399	B.1.1.7
MW877138	B.1.1.7
MW842174	B.1.1.7
MW935798	B.1.1.7
MW968119	B.1.1.7
MW967127	B.1.1.7
MW931141	B.1.1.7
MW912195	B.1.1.7
MW969434	B.1.1.7
MW844959	B.1.1.7
MW894283	B.1.1.7
MZ001561	B.1.1.7
MW990737	B.1.1.7
MW729268	B.1.1.7
MZ022255	B.1.1.7
MW840982	B.1.1.7
MW990848	B.1.1.7
MW864645	B.1.1.7
MW931442	B.1.1.7
MW909417	B.1.1.7
MW972041	B.1.1.7
MW892173	B.1.1.7
MW864768	B.1.1.7
MW967329	B.1.1.7
MW841823	B.1.1.7
MW931443	B.1.1.7
MW912014	B.1.1.7
MW842171	B.1.1.7
MZ054405	B.1.1.7
MW929943	B.1.1.7
MW963398	B.1.1.7
MZ000189	B.1.1.7
MZ056052	B.1.1.7
MZ022791	B.1.1.7
MW840914	B.1.1.7
MZ002715	B.1.1.7
MW841942	B.1.1.7
MZ012968	B.1.1.7
MZ009634	B.1.1.7
MW930087	B.1.1.7
MZ037629	B.1.1.7
MZ000365	B.1.1.7
MZ023136	B.1.1.7
MW967787	B.1.1.7
MW912062	B.1.1.7
MW963813	B.1.1.7
MW932064	B.1.1.7
MW905465	B.1.1.7
MW966342	B.1.1.7
MW869270	B.1.1.7
MZ069223	B.1.1.7
MW979417	B.1.1.7
MW989205	B.1.1.7
MZ058850	B.1.1.7
MW990548	B.1.1.7
MW990589	B.1.1.7
MZ061481	B.1.1.7
MZ021867	B.1.1.7
MW989170	B.1.1.7
MZ030162	B.1.1.7
MZ009776	B.1.1.7
MZ060986	B.1.1.7
MZ035006	B.1.1.7
MZ070154	B.1.1.7
MZ058761	B.1.1.7
MZ058789	B.1.1.7
MZ061530	B.1.1.7
MZ060465	B.1.1.7
MZ035706	B.1.1.7
MZ059279	B.1.1.7
MZ032399	B.1.1.7
MZ032651	B.1.1.7
MZ064998	B.1.1.7
MZ071433	B.1.1.7
MZ062174	B.1.1.7
MZ035701	B.1.1.7
MW990625	B.1.1.7
MZ035005	B.1.1.7
MW965117	B.1.1.7
MZ009721	B.1.1.7
MZ044536	B.1.1.7
MZ006631	B.1.1.7
MW959402	B.1.1.7
MZ068900	B.1.1.7
MZ034492	B.1.1.7
MZ061116	B.1.1.7
MZ018854	B.1.1.7
MZ062195	B.1.1.7
MZ022641	B.1.1.7
MZ035827	B.1.1.7
MZ053636	B.1.1.7
MZ058279	B.1.1.7
MZ029974	B.1.1.7
MZ034810	B.1.1.7
MZ035486	B.1.1.7
MZ009123	B.1.1.7
MZ058705	B.1.1.7
MZ025780	B.1.1.7
MZ056116	B.1.1.7
MZ061185	B.1.1.7
MZ058820	B.1.1.7
MZ009021	B.1.1.7
MZ060751	B.1.1.7
MZ058385	B.1.1.7
MW972295	B.1.1.7
MZ029980	B.1.1.7
MZ061231	B.1.1.7
MZ046462	B.1.1.7
MZ007040	B.1.1.7
MZ056442	B.1.1.7
MW965045	B.1.1.7
MZ009789	B.1.1.7
MZ039723	B.1.1.7
MZ034395	B.1.1.7
MZ073516	B.1.1.7
MW988498	B.1.1.7
MZ049953	B.1.1.7
MZ030348	B.1.1.7
MZ073594	B.1.1.7
MZ035376	B.1.1.7
MZ034245	B.1.1.7
MZ009175	B.1.1.7
MW988127	B.1.1.7
MZ015045	B.1.1.7
MZ045338	B.1.1.7
MW965088	B.1.1.7
MZ025355	B.1.1.7
MZ044632	B.1.1.7
MZ015478	B.1.1.7
MZ053874	B.1.1.7
MZ025530	B.1.1.7
MZ048527	B.1.1.7
MZ013323	B.1.1.7
MZ056226	B.1.1.7
MZ023907	B.1.1.7
MZ062142	B.1.1.7
MZ025340	B.1.1.7
MZ006140	B.1.1.7
MZ046744	B.1.1.7
MZ013382	B.1.1.7
MZ045278	B.1.1.7
MW965042	B.1.1.7
MZ023913	B.1.1.7
MZ015042	B.1.1.7
MZ046493	B.1.1.7
MZ045070	B.1.1.7
MZ072657	B.1.1.7
MZ025120	B.1.1.7
MZ013249	B.1.1.7
MZ013459	B.1.1.7
MZ025373	B.1.1.7
MZ073399	B.1.1.7
MZ006021	B.1.1.7
MZ009843	B.1.1.7
MZ046503	B.1.1.7
MZ034916	B.1.1.7
MW965066	B.1.1.7
MZ023894	B.1.1.7
MZ064851	B.1.1.7
MW243999	B.1.110.3
MW882630	B.1.110.3
MW696853	B.1.110.3
MW673435	B.1.110.3
MZ024638	B.1.110.3
MW075735	B.1.2
MW474123	B.1.2
MW332980	B.1.2
MW341805	B.1.2
MW928319	B.1.2
MW661009	B.1.2
MW495926	B.1.2
MW493917	B.1.2
MW645534	B.1.2
MW406529	B.1.2
MW384423	B.1.2
MW739601	B.1.2
MW449408	B.1.2
MW645659	B.1.2
MW925621	B.1.2
MW565317	B.1.2
MW930410	B.1.2
MW925611	B.1.2
MW929571	B.1.2
MW565305	B.1.2
MW973148	B.1.2
MW584948	B.1.2
MW518839	B.1.2
MW634899	B.1.2
MW938052	B.1.2
MW617866	B.1.2
MW883244	B.1.2
MW634525	B.1.2
MW486329	B.1.2
MW973851	B.1.2
MW486208	B.1.2
MW974139	B.1.2
MW882781	B.1.2
MW925565	B.1.2
MW701135	B.1.2
MW709163	B.1.2
MW925141	B.1.2
MW738555	B.1.2
MW925181	B.1.2
MW973849	B.1.2
MW454475	B.1.2
MW973195	B.1.2
MW590392	B.1.2
MW550595	B.1.2
MW700545	B.1.2
MW960451	B.1.2
MW524946	B.1.2
MW525058	B.1.2
MW583175	B.1.2
MW638292	B.1.2
MW577055	B.1.2
MW667219	B.1.2
MW730919	B.1.2
MW642635	B.1.2
MW708917	B.1.2
MW586727	B.1.2
MW673313	B.1.2
MW586522	B.1.2
MW550174	B.1.2
MW938686	B.1.2
MW708470	B.1.2
MW638788	B.1.2
MW876958	B.1.2
MW665782	B.1.2
MW708571	B.1.2
MW925269	B.1.2
MW708719	B.1.2
MW524923	B.1.2
MW577797	B.1.2
MW617579	B.1.2
MW586342	B.1.2
MW520906	B.1.2
MW617534	B.1.2
MW586240	B.1.2
MZ028739	B.1.2
MW795984	B.1.2
MW640980	B.1.2
MW725971	B.1.2
MW646750	B.1.2
MW795918	B.1.2
MZ008711	B.1.2
MW743297	B.1.2
MW638409	B.1.2
MW596230	B.1.2
MW640670	B.1.2
MW667115	B.1.2
MW708490	B.1.2
MW523831	B.1.2
MW768072	B.1.2
MW780565	B.1.2
MW673415	B.1.2
MW848060	B.1.2
MW719553	B.1.2
MW672674	B.1.2
MW733219	B.1.2
MW696909	B.1.2
MW758607	B.1.2
MW779435	B.1.2
MW848399	B.1.2
MW892743	B.1.2
MW849919	B.1.2
MW668525	B.1.2
MW771810	B.1.2
MW631883	B.1.2
MW715492	B.1.2
MW749532	B.1.2
MW758827	B.1.2
MW715147	B.1.2
MW777467	B.1.2
MW763456	B.1.2
MW694143	B.1.2
MW779388	B.1.2
MW725967	B.1.2
MW778311	B.1.2
MW734632	B.1.2
MW780440	B.1.2
MW821888	B.1.2
MW776962	B.1.2
MW731375	B.1.2
MW693346	B.1.2
MW666651	B.1.2
MW749462	B.1.2
MW777390	B.1.2
MW733486	B.1.2
MW763272	B.1.2
MW749268	B.1.2
MW669000	B.1.2
MW631829	B.1.2
MW681357	B.1.2
MW705968	B.1.2
MW771848	B.1.2
MW777261	B.1.2
MW626333	B.1.2
MW720034	B.1.2
MW684683	B.1.2
MW728462	B.1.2
MW720049	B.1.2
MW778406	B.1.2
MW749280	B.1.2
MW763976	B.1.2
MW698092	B.1.2
MW715176	B.1.2
MW666692	B.1.2
MW863841	B.1.2
MW731192	B.1.2
MW681362	B.1.2
MW771832	B.1.2
MW720006	B.1.2
MW778110	B.1.2
MW783196	B.1.2
MW932318	B.1.2
MW805101	B.1.2
MW993705	B.1.2
MW967016	B.1.2
MW851552	B.1.2
MW990345	B.1.2
MW880518	B.1.2
MW891992	B.1.2
MW935776	B.1.2
MW870905	B.1.2
MW782996	B.1.2
MW891249	B.1.2
MW763839	B.1.2
MZ024244	B.1.2
MW825404	B.1.2
MZ024857	B.1.2
MW783049	B.1.2
MW968278	B.1.2
MW808840	B.1.2
MW868670	B.1.2
MW825472	B.1.2
MW808584	B.1.2
MW850260	B.1.2
MW891279	B.1.2
MW805064	B.1.2
MW851032	B.1.2
MW993044	B.1.2
MW763140	B.1.2
MW850243	B.1.2
MW825614	B.1.2
MW992930	B.1.2
MW891644	B.1.2
MW782907	B.1.2
MW849159	B.1.2
MW903659	B.1.2
MW868691	B.1.2
MZ046647	B.1.2
MW966045	B.1.2
MW848038	B.1.2
MW849949	B.1.2
MW891938	B.1.2
MW993066	B.1.2
MW782932	B.1.2
MW849135	B.1.2
MW793202	B.1.2
MZ011906	B.1.2
MW965163	B.1.2
MZ046519	B.1.2
MW593051	B.1.232
MW591259	B.1.232
MW280502	B.1.234
MW454761	B.1.234
MW863745	B.1.234
MW583343	B.1.234
MW703030	B.1.234
MW738320	B.1.234
MW523859	B.1.234
MW739381	B.1.234
MW668573	B.1.234
MW666640	B.1.234
MW669619	B.1.234
MW935680	B.1.234
MW693990	B.1.239
MW279328	B.1.240
MW565233	B.1.240
MW496041	B.1.240
MW435626	B.1.240
MW738638	B.1.240
MW454411	B.1.241
MW972855	B.1.243
MW276588	B.1.243
MW738322	B.1.243
MW667335	B.1.243
MW738293	B.1.243
MW947503	B.1.243
MW763842	B.1.243
MW792705	B.1.243
MW766416	B.1.243
MW696924	B.1.243
MW778372	B.1.243
MW720320	B.1.243
MW720011	B.1.243
MW777326	B.1.243
MW805057	B.1.243
MZ044602	B.1.243
MW851565	B.1.243
MW968827	B.1.243
MW616846	B.1.258.23
MW487278	B.1.265
MW925626	B.1.265
MW524019	B.1.265
MW585844	B.1.306
MW701262	B.1.311
MW634215	B.1.311
MW758605	B.1.311
MW699297	B.1.311
MW813728	B.1.311
MW972887	B.1.320
MW668920	B.1.324
MW883210	B.1.346
MW517777	B.1.346
MW930469	B.1.349
MW667304	B.1.349
MZ002856	B.1.351
MZ025089	B.1.351
MW181742	B.1.36.27
MW638984	B.1.36.38
MW217369	B.1.369
MW474142	B.1.369
MW454635	B.1.369
MW580568	B.1.369
MW485329	B.1.375
MW485325	B.1.375
MW485322	B.1.375
MW485318	B.1.375
MW523846	B.1.375
MW520941	B.1.375
MW750129	B.1.375
MW719817	B.1.396
MW483500	B.1.399
MW522510	B.1.400
MW566251	B.1.400
MW476562	B.1.400
MW973218	B.1.400
MW648760	B.1.400
MW788824	B.1.400
MW645949	B.1.403
MW645951	B.1.403
MW709148	B.1.409
MW973208	B.1.427
MW738261	B.1.427
MW876979	B.1.427
MW923570	B.1.427
MW672716	B.1.427
MW923256	B.1.427
MW644495	B.1.427
MW681476	B.1.427
MZ011414	B.1.427
MW921983	B.1.427
MW911402	B.1.427
MW848244	B.1.427
MW864480	B.1.427
MW989820	B.1.427
MW783114	B.1.427
MW897619	B.1.427
MW870110	B.1.427
MZ035211	B.1.427
MZ009276	B.1.427
MZ025907	B.1.427
MW483438	B.1.429
MW420347	B.1.429
MW653496	B.1.429
MW653603	B.1.429
MW653498	B.1.429
MW700485	B.1.429
MW702249	B.1.429
MW702118	B.1.429
MW564746	B.1.429
MW702808	B.1.429
MW617594	B.1.429
MW702401	B.1.429
MW702394	B.1.429
MW586446	B.1.429
MW837505	B.1.429
MW495069	B.1.429
MW591576	B.1.429
MW701163	B.1.429
MW703012	B.1.429
MW702148	B.1.429
MW735581	B.1.429
MW668865	B.1.429
MW923623	B.1.429
MW851395	B.1.429
MW848292	B.1.429
MW993399	B.1.429
MW967353	B.1.429
MW911420	B.1.429
MW993029	B.1.429
MW969489	B.1.429
MW966531	B.1.429
MW849149	B.1.429
MW891905	B.1.429
MW849985	B.1.429
MZ006415	B.1.429
MW850582	B.1.429
MW808679	B.1.429
MZ046555	B.1.429
MW990554	B.1.429
MZ020732	B.1.429
MW667317	B.1.433
MW509805	B.1.466
MZ006524	B.1.466.2
MW633908	B.1.499
MW454665	B.1.509
MW540279	B.1.517
MW495140	B.1.517
MW665711	B.1.517
MW523868	B.1.517
MW763831	B.1.517
MW668488	B.1.517
MW733287	B.1.517
MW783134	B.1.517
MW584950	B.1.523
MW975218	B.1.525
MW914655	B.1.525
MZ030207	B.1.525
MW975703	B.1.526
MW975759	B.1.526
MW975032	B.1.526
MW750090	B.1.526
MW965920	B.1.526
MW994137	B.1.526
MW969307	B.1.526
MW931428	B.1.526
MW964979	B.1.526
MW935688	B.1.526
MW976373	B.1.526
MW908206	B.1.526
MW986310	B.1.526
MW892316	B.1.526
MW976326	B.1.526
MW891866	B.1.526
MW976743	B.1.526
MW976742	B.1.526
MZ009554	B.1.526
MW903601	B.1.526
MZ023626	B.1.526
MW993196	B.1.526
MW991209	B.1.526
MW880452	B.1.526
MZ001113	B.1.526
MZ060444	B.1.526
MZ032295	B.1.526
MW971457	B.1.526
MZ069244	B.1.526
MW937865	B.1.526
MZ003910	B.1.526
MZ030071	B.1.526
MZ035770	B.1.526
MW768002	B.1.526.1
MW935788	B.1.526.1
MW993279	B.1.526.1
MW976426	B.1.526.1
MW976108	B.1.526.1
MW903393	B.1.526.1
MW963377	B.1.526.1
MW966805	B.1.526.1
MZ025678	B.1.526.1
MZ025766	B.1.526.1
MZ070835	B.1.526.1
MZ064799	B.1.526.1
MZ034257	B.1.526.1
MW689815	B.1.526.2
MW975470	B.1.526.2
MZ056132	B.1.526.2
MW932243	B.1.526.2
MW880511	B.1.526.2
MZ002685	B.1.526.2
MZ023969	B.1.526.2
MW994075	B.1.526.2
MW968788	B.1.526.2
MW864195	B.1.526.2
MZ061130	B.1.526.2
MZ030047	B.1.526.2
MZ021729	B.1.526.2
MZ046943	B.1.526.2
MZ064983	B.1.526.2
MZ056253	B.1.526.2
MZ035673	B.1.526.2
MW708823	B.1.541
MW665800	B.1.551
MW631758	B.1.551
MW562730	B.1.561
MW332758	B.1.564
MW192116	B.1.565
MW681472	B.1.565
MW863885	B.1.568
MW771957	B.1.568
MW975579	B.1.575
MW975193	B.1.575
MW975367	B.1.575
MW976440	B.1.575
MW976056	B.1.575
MW976613	B.1.575
MW550226	B.1.577
MW592882	B.1.582
MW725919	B.1.582
MW673248	B.1.588
MW928161	B.1.591
MW930600	B.1.595
MW495080	B.1.595
MW897442	B.1.596
MW565354	B.1.596
MW523487	B.1.596
MW582240	B.1.596
MW708467	B.1.596
MW505186	B.1.596
MW629479	B.1.596
MW888182	B.1.596
MW708233	B.1.596
MW737966	B.1.596
MW731369	B.1.596
MW773328	B.1.596
MW698175	B.1.596
MW731713	B.1.596
MW763765	B.1.596
MW696986	B.1.596
MW696483	B.1.596
MW993272	B.1.596
MW805143	B.1.596
MW848934	B.1.596
MW894570	B.1.596
MW783260	B.1.596
MW763717	B.1.596
MW851731	B.1.596
MW880599	B.1.596
MZ073385	B.1.596
MW992931	B.1.604
MW550447	B.1.608
MW460883	B.1.609
MW202227	B.1.612
MW246599	B.1.612
MW882649	B.1.612
MW673348	C.23
MW509808	C.36
MW831585	C.36
MW155117	D.2
MW155367	D.2
MW155080	D.2
MW184691	D.2
MZ083744	B.1.1.519
MZ082676	B.1.1
MZ100224	B.1.1.7
MZ075410	B.1.1.7
MZ082932	B.1.427
MZ084852	B.1.1.7
MZ075487	B.1.1.7
MZ082547	B.1.1.7
MZ085684	B.1.1.7
MZ073816	B.1.1.7
MZ082825	B.1.1.7
MZ074899	B.1.526.1
MZ074806	B.1.1.7
MZ101197	B.1.1.7
MZ089630	B.1.1.519
MZ101884	B.1.526.2
MZ083891	B.1.1.7
MZ100193	B.1.2
MZ083771	B.1.526
MZ101299	B.1.1.7
MZ074046	B.1.1.7
MZ074715	B.1.1.7
MZ101200	B.1.1.7
MZ085776	B.1.1.7
MZ086576	B.1.1.7
MZ100773	B.1.1.7
MZ090373	B.1.526.2
MZ100146	B.1.2
MZ085816	B.1.1.7
MZ074389	B.1.1.7
MZ074574	B.1.1.7
MZ074443	B.1.1.7
MZ086319	B.1.234
MZ085334	P.2
MZ075396	B.1.526.1
MZ082323	B.1.1.7
MZ086588	B.1.1.7
MZ084713	B.1.1.7
MZ100619	B.1.1.7
MZ083551	B.1.1.7
MZ084637	B.1.1.7
MZ075291	P.1
MZ083670	B.1.1.7
MZ086530	B.1.1.7
MZ074383	B.1.1.7
MZ084066	B.1.1.7
MZ075284	B.1.1.7
MZ100990	B.1.1.7
MZ085710	B.1.1.7
MZ084466	B.1.1.7
MZ100394	B.1.1.7
MZ090385	B.1.1.7
MZ086013	B.1.1.519
MZ090151	B.1.1.7
MZ100762	B.1.526
MZ075267	B.1.1.7
MZ084744	B.1.1.7
MZ097535	B.1.526.1
MZ086491	B.1.1.7
MZ085407	B.1.526
MZ076068	B.1.1.7
MZ083896	A.2.5
MZ075956	B.1.1.7
MZ086280	B.1.1.7
MZ088010	B.1.1.7
MZ100704	B.1.1.7
MZ100575	B.1.1.7
MZ083706	B.1.1.7
MZ083457	B.1.1.7
MZ101505	P.1
MZ075423	B.1.1.222
MZ084623	B.1.2
MZ083969	P.1
MZ088007	B.1.1.7
MZ074074	B.1.1.7
MZ085957	B.1.1.7
MZ100173	B.1.526.2
MZ100285	B.1.526.2
MZ101004	B.1.1.7
MZ074401	B.1.526
MZ086043	B.1.526
MZ100911	B.1.1.7
MZ083960	B.1.526.1
MZ084047	B.1.2
MZ074402	B.1.526
MZ101133	B.1.526
MZ100657	B.1.1.7
MZ085286	B.1.1.7
MZ076087	B.1.526.1
MZ082722	B.1.1.7
MZ100912	B.1.1.7
MZ101081	B.1.526
MZ075597	B.1.1.7
MZ101027	B.1.1.7
MZ085248	B.1.1.7
MZ083856	P.1
MZ084371	P.1
MZ093192	C.36
MZ093193	C.36
MZ093194	C.36
MZ093196	B.1.160
MZ093197	B.1.160
MZ093198	B.1.160
MZ093199	B
MZ093200	B
MZ093201	B
MZ093202	B
MZ093206	B.1
MZ093207	B.1
MZ093208	B.1
MZ093209	B.1
MZ093210	C.36
MZ093211	C.36
MZ093212	C.36
MZ093213	C.36
MZ006984	P.1
MW963236	P.1
MW894429	P.1
MW779588	P.2
MW779032	P.2
MW696344	P.2
MW705915	P.2
MW782912	P.2
MW782959	P.2
MW984917	R.1
MW930389	R.1
MW673676	R.1
MW938144	R.1
MW687174	R.1
MW990787	R.1
MW991259	R.1
MW891922	R.1
MZ000087	R.1
MZ009359	R.1
MW901867	B.1.617.1
MW965625	B.1.617.1
MW903294	B.1.617.1

## Sheet: Supplementary File 2  Sheet 6
Supplementary File 2: Sheet 6
Number of sequences belonging to each Pango lineage
Pango lineage	Number of sequences
A.2.5	1
A.23.1	2
B	4
B.1	17
B.1.1	1
B.1.1.135	1
B.1.1.139	1
B.1.1.174	1
B.1.1.205	2
B.1.1.207	4
B.1.1.222	6
B.1.1.265	1
B.1.1.306	1
B.1.1.316	2
B.1.1.322	1
B.1.1.345	1
B.1.1.348	3
B.1.1.362	2
B.1.1.416	1
B.1.1.432	1
B.1.1.434	6
B.1.1.519	29
B.1.1.7	358
B.1.110.3	5
B.1.160	3
B.1.2	202
B.1.232	2
B.1.234	13
B.1.239	1
B.1.240	5
B.1.241	1
B.1.243	18
B.1.258.23	1
B.1.265	3
B.1.306	1
B.1.311	5
B.1.320	1
B.1.324	1
B.1.346	2
B.1.349	2
B.1.351	2
B.1.36.27	1
B.1.36.38	1
B.1.369	4
B.1.375	7
B.1.396	1
B.1.399	1
B.1.400	6
B.1.403	2
B.1.409	1
B.1.427	21
B.1.429	40
B.1.433	1
B.1.466	1
B.1.466.2	1
B.1.499	1
B.1.509	1
B.1.517	8
B.1.523	1
B.1.525	3
B.1.526	41
B.1.526.1	18
B.1.526.2	21
B.1.541	1
B.1.551	2
B.1.561	1
B.1.564	1
B.1.565	2
B.1.568	2
B.1.575	6
B.1.577	1
B.1.582	2
B.1.588	1
B.1.591	1
B.1.595	2
B.1.596	26
B.1.604	1
B.1.608	1
B.1.609	1
B.1.612	3
B.1.617.1	3
C.23	1
C.36	9
D.2	4
P.1	8
P.2	7
R.1	10

## Sheet: Supplementary File2  Sheet 7
Supplementary File2: Sheet 7
Conserved region of coding region sequences of 13 SARS-CoV-2 proteins
Protein	Conserved regions	Positions of the conserved regions in the coding sequences of the particular protein
Envelope protein	AGGTACGTTAATAGTTAATAGCGTACTTCTTTTT	27 -60
	CTAGTTACACTAGCCATCCTTACTGCGCTTCGATTGTGTGCGTACTGCTGCAATATTGTTAACGTGAGTCTTGTAAAACCTT	82-163
	TCGTGTTAAAAATCTGAATTCTT	180-202
Membrane glycoprotein	ACCGTTGAAGAGCTTAAAAAGCTC	25-48
	CTTGTTTTGTGCTTGCTGCT	188-207
	AGAATAAATTGGATCACCGGTGG	214-236
	TGGTCATTCAATCCAGAAACTAA	328-350
	TCACTGTTGCTACATCACGAACGCT	503-527
	CAATATTGCTTTGCTTGTACAGTAA	645-669
Nucleocapsid phosphoprotein	TTCCAATTAACACCAATAGCA	215-235
	TACCGAAGAGCTACCAGACGAATTCGTGGTGGTGACGGTAAAATGAAA	259-306
Surface glycoprotein	AAAACAGGGTAATTTCAAAAAT	552-573
	GAATTTGTGTTTAAGAATATTG	580-601
	TTTAAAATATATTCTAAGCACACGCCTATTAA	610-641
	GGTATTAACATCACTAGGTTTCAA	712-735
	TACTAAATTAAATGATCTCTGCTTTACTAATGT	1170-1202
	TATGCAGATTCATTTGTAATTAGAGGTGATGAAGTCAGACAAAT	1204-1247
	ATTGCTGATTATAATTATAAATTACCAGATGATTTTACAGGCTGCGTTATAGCTTGGAATTCTAA	1270-1334
	CTTGATTCTAAGGTTGGTGGTAATTATAATTACC	1339-1372
	TTTCAACTGAAATCTATCAGG	1241-1441
	CTGTTTGTGGACCTAAAAAGTCTAC	1586-1610
	TACTCCTACTTGGCGTGTTTATTCTACAGG	1905-1934
	TAATGTTTTTCAAACACGTGCAGGCTGTTTAATAGG	1938-1973
	AACTCATATGAGTGTGACATACCCAT	1990-2015
	AATGTACATTTGTGGTGATTCAA	2235-2257
	CAATCTTTTGTTGCAATATGGCAGTTTTTGTA	2268-2299
	TTTAATTTTTCACAAATATTACCAGA	2416-2441
	TTGGTGCAGGTGCTGCATTACAAATACC	2681-2708
	GGTATTGGAGTTACACAGAATGTTCTCTATGAGAACCAAAAATTGATTGCCAA	2740-2792
	ACGCTTGTTAAACAACTTAGCTC	2899-2921
	CACGTCTTGACAAAGTTGAGGC	2963-2984
	ACAGGCAGACTTCAAAGTTTGCAGA	3010-3034
	ATATGTGACTCAACAATTAATTAGAGCTGCAGAAATCAGAG	3036-3076
	AACTGTGATGTTGTAATAGGAATTG	3391-3415
	GAGTTAGATAAATATTTTAAGAATCATACATCACCA	3469-3504
	CAGTATATAAAATGGCCATGGTA	3640-3662
	CTGCTGCAAATTTGATGAAGA	3774-3794
Orf3a	ACTTCAGACTATTACCAGCTGTACTCAA	622-649
Orf 7b	ACTTCAGACTATTACCAGCTGTACTCAA	622-649
Orf 10	TTACGATATATAGTCTACTCTTGTG	32-56
Orf 6	TAATTAAAAATTTATCTAAGTC	107-128
	TGAGAATAAATATTCTCAATTAGATGAAGAGCA	135-167
Leader protein	GTTTCAACGAGAAAACACACGTCCAACT	20-47
	AGTTTGCCTGTTTTACAGGTT	49-69
	GAGCTTGGCACTGATCCTTATGAAGA	448-473
3 -C like proteinase	AGACATGTGATCTGCACCTCTGA	118-140
	ATTCGTAAGTCTAATCATAATTT	175-197
	GTACAGGCTGGTAATGTTCAA	202-222
	AATGGTTCACCATCTGGTGTTTA	355-377
	ACTATTAAGGGTTCATTCCTTAA	403-425
	GGTTCATGTGGTAGTGTTGGTTTTAA	427-452
	CACCATATGGAATTACCAACTGGAGTTCAT	487-516
	TTAGAAGGTAACTTTTATGGACCTTTT	529-555
	TTATAAATGGAGACAGGTGGTTTCTCAATCGATTTA	635-670
RNA-dependent RNA Polymerase	TTTTTAAACCGGGTTTGCGGTGTAAGTGCAGCCCGTCTT	19-57
	AATGATAAAGTAGCTGGTTTTGCTAAATT	115-143
	TGACAATTTAATTGATTCTTA	186-206
	TTTCTCTAACTACCAACATGAAGAAA	228-253
	TATGCTTTAAGGCATTTTGATGAAGGTAATTGTGA	385-419
	TTAAAAGAAATACTTGTCACATA	424-446
	GATTATTTCAATAAAAAGGACTGGTATGATTTTGTAGAAAA	463-503
	TGTGATGCCATGCGAAATGCTGGTATTGTTGGTGTACT	577-614
	ACATTAGATAATCAAGATCTCAATGGTAACTGGTATGATTTCGGTGATTTCATACAAA	616-673
	AGTTCCTGTTGTAGATTCTTATTATTCATTGTTAATGCCTA	690-730
	TTCACGGAAGAGAGGTTAAAACTCTTTGACCGTTA	823-857
	TGTTTGGATGACAGATGCATTCTGCATTGT	901-930
	GTTTTATTCTCTACAGTGTTCCCA	943-966
	TACAAGTTTTGGACCACTAGTGAGAAAAATATTTGTTGATGGTGTTCCATT	969-1019
	GTAGTTTCAACTGGATACCACTT	1021-1043
	TACATAATCAGGATGTAAACTTACATAGCTCTAGACTTAGTTTTAAGGAATTACTTGTGTATGCTGCTGACCC	1061-1133
	ATGCACGCTGCTTCTGGTAAT	1138-1158
	GCTGCACTTACTAACAATGTTGCTTTTCAAACTGT	1195-1229
	TTTAAGGAAGGAAGTTCTGTTGA	1285-1307
	TTAAAACACTTCTTCTTTGCTCAG	1309-1332
	CGTTATAATCTACCAACAATGTGTGATATCAGACAACTACTATTTGT	1369-1415
	GATGGTGGCTGTATTAATGCTAA	1450-1472
	TTTCCATTTAATAAATGGGGTAAGGCTAGACTTTATTATGATTCAATGAGTTATGAGGATCAAGAT	1510-1575
	ATCCCTACTATAACTCAAATGAA	1606-1628
	AAGTATGCCATTAGTGCAAAGAA	1633-1655
	AGAGCTCGCACCGTAGCTGGTGTCTCTATCTGTAGTACTATGACCAA	1657-1703
	AGACAGTTTCATCAAAAATTATTGAA	1705-1730
	GGAACAAGCAAATTCTATGGTGGTTGG	1768-1794
	CTTATGGGTTGGGATTATCCTAAATGTGATAGAGC	1840-1874
	TAGCTAATGAGTGTGCTCAAGT	1964-1985
	GATGCCACAACTGCTTATGCTAATAGTGTTTTTAACATTTGTCAAGCTGT	2050-2099
	ACGGCCAATGTTAATGCACTTTTATCTACTGATGGTAACAAAATTGCCGATAA	2101-2153
	TCCGCAATTTACAACACAGACTTTATG	2159-2185
	GTTTTACGCATATTTGCGTAAACATTTCTCAATGATGATACT	2232-2273
	ATAAAGAACTTTAAGTCAGTTCTTTATTATCAAAA	2335-2369
	AATGTTTTTATGTCTGAAGCAAAATGTTGGAC	2371-2402
	TAAAGGACCTCATGAATTTTG	2418-2438
	GGCTGTTTTGTAGATGATATC	2521-2541
	TAAAAACAGATGGTACACTTATGATTGAACGGTTCGTGTCTTT	2543-2585
	GCTATAGATGCTTACCCACTTA	2587-2608
	AAACATCCTAATCAGGAGTATGCTGATGTCTTTCATTTGTA	2611-2651
	TACATGATGAGTTAACAGGACACATGTTAGACATGTATTCTGTTATGCTTACTAATGATAA	2776-2795

## Sheet: Supplementary File 3
Supplementary File 3
FILTER CRITERIA of Sirna module of S-fold: ("<=": less than or equal to)
A) Antisense siRNA binding energy <= -10 kcal/mol
B) Duplex feature score of 6 or higher;
C) DSSE > 0 kcal/mol (asymmetry rule);
D) AIS > -8.6 kcal/mol (cleavage site instability rule);
E) 30% <= GC % <= 60%;
F) Exclusion of target sequence with at least one of AAAA,CCCC,GGGG and UUUU

## Sheet: Supplementary File 4  Sheet 1
Supplementary File 4: Sheet 1
Finally selected siRNAs with some parameters computed by siRNA of S-fold
Alias	Conserved region position in RdRp	Target sequence location within conserved region	siRNA target within conserved region	Guide (Antisense) strand	Passenger (Sense)strand	Total score for siRNA duplex	Target accessibility score	Duplex thermodynamics score	Differential stability of siRNA duplex ends (DSSE ,kcal/mol)	Average internal stability at the cleavage site (AIS ,kcal/mol)	Duplex feature score
S1	2232-2273	15-37	TGCGTAAACATTTCTCAATGATG	UCAUUGAGAAAUGUUUACGCA	CGUAAACAUUUCUCAAUGAUG	17	8	2	0.8	-5.7	7
S2	2611-2651	13-35	CAGGAGTATGCTGATGTCTTTCA	AAAGACAUCAGCAUACUCCUG	GGAGUAUGCUGAUGUCUUUCA	17	7	2	5.3	-7.9	8

[truncated: 3 more sheets: Supplementary File 4  Sheet 2, Supplementary File 5, Supplementary File 6]
